*Psychotherapy*

**FOCUS** THE JOURNAL OF LIFELONG LEARNING IN PSYCHIATRY

Winter 2010, Volume VIII, Number 1

# FOCUS

THE JOURNAL OF LIFELONG LEARNING IN PSYCHIATRY



## *Psychotherapy*

*Guest Editor, Priyanthy Weerasekera, M.D., M.Ed.*

### IN CLINICAL SYNTHESIS:

Psychotherapy Update for the Practicing Psychiatrist:  
Promoting Evidence-Based Practice

*Priyanthy Weerasekera, M.D., M.Ed.*

Mindfulness and Psychotherapy

*Kathy M. Sanders, M.D.*

Beyond the Supportive-Expressive Continuum:  
An Integrated Approach to Psychodynamic  
Psychotherapy in Clinical Practice

*Deborah L. Cabaniss, M.D.*

*Melissa R. Arbuckle, M.D., Ph.D.*

*Carolyn Douglas, M.D.*

Emotion-Focused Therapy:  
A Clinical Synthesis

*Leslie S. Greenberg, Ph.D.*

AND INFLUENTIAL PUBLICATIONS . . .
